# Supplementary material for: Identifying potential indicators to measure the outcome of translational cancer research: a mixed methods approach
Source: PubMed Central journal article supplement (PMC4669638; doi:10.1186/s12961-015-0060-5), 2015-12-03
Supplement: 12961_2015_60_MOESM2_ESM.pdf [file 12961_2015_60_MOESM2_ESM.pdf]

# Indicators of research activity, output and outcomes

## Description

The objective of the EurocanPlatform network is to build a strong platform for translational research in oncology in order to share the resources and infrastructures of that research and produce better research outcomes.

Within this project, we are developing a set of indicators designed to evaluate the activity and production of the translational research performed in the platform in terms of benefits for science and society. A draft list of indicators was drawn from a systematic review and interviews with researchers. In order to make a selection within that list and to set up a list of indicators that are acceptable to all researchers involved, we are conducting a Delphi survey amongst researchers in oncology. Your contribution is highly valuable to us and we thank you in advance to take the time to answer this questionnaire.

The Delphi method is widely used for the task of achieving consensus among a group of experts on a particular topic. Two or more questionnaire rounds are completed to achieve a consensus among panellists selected based on expertise in the relevant field. After each round, the respondents are asked to reconsider their answers based on both their own opinion and the group response to the previous round. Therefore, we need to collect some information such as your name and email address in order to send you the second round questionnaire. However your answers will remain strictly confidential.

Please note that the following indicators are indicators measuring activity, outputs and outcomes (and not inputs) of the research carried out by institutions (cancer centres, hospitals, research units but not countries or individual researchers).

Instructions:

- Indicators are classified into 6 categories: indicators of research activity, indicators of collaboration, indicators of dissemination, indicators of industrial production, indicators of research outcome/impact and bibliometric indicators.
- You will be asked to rate each indicator for its feasibility and validity. The feasibility of an indicator refers to the possibility and burden of measuring an indicator. It includes conditions such as data availability, comparability of data across cancer centres and countries, and burden of data collection. The validity of an indicator means its capacity to measure what it is intended to measure.
- You will be asked to select the most important indicators in each category (maximum of 5 by category)
- You will be invited to provide comments on each indicator
- At the end of the survey you will be invited to provide free comments and provide up to 5 additional indicators measuring research impact (in terms of patient's outcome)

## General information

### \*1. Your name:

### 2. Your gender:

 M F

### 3. Your year of birth:

## Indicators of research activity, output and outcomes

### \*4. Your academic background (up to three answers possible):

- Medical
- Pharmacist
- Biologist
- Chemist
- Physicist
- Nurse
- Other (please precise)

### \*5. Please indicate the number of years you have worked in cancer research:

### 6. Please indicate your job title:

### 7. Please indicate your institution:

## Indicators of research activity

Definition: Indicators of research activity are proxies to measure the state and progression of the translational research performed in an institution

The feasibility of an indicator refers to the possibility and burden of measuring it. It includes conditions such as data availability, comparability of data across cancer centres and countries, and burden of data collection. The validity of an indicator means its capacity to measure what it is intended to measure.

## Indicator: Number of clinical trials

Definition : Number of clinical trials (open to patient's inclusion) active in a cancer centre in a specific year

### 8. Do you understand this indicator?

- Yes
- No

## Indicators of research activity, output and outcomes

### 9. Feasibility

1 (definitely not feasible)      2      3      4      5      6      7      8      9 (definitely feasible)

                                              

### 10. Validity

1 (definitely not valid)      2      3      4      5      6      7      8      9 (definitely valid)

                                              

### 11. Comments

## Indicator: % of patients included in clinical trial

Definition : Number of patients that participate in a clinical trial/ Number of patients treated at a hospital in a specific year

### 12. Do you understand this indicator?

- Yes
- No

### 13. Feasibility

1 (definitely not feasible)      2      3      4      5      6      7      8      9 (definitely feasible)

                                              

### 14. Validity

1 (definitely not valid)      2      3      4      5      6      7      8      9 (definitely valid)

                                              

### 15. Comments

## Indicator: Number of biomarkers identified

Definition : Number of biomarkers identified by the research institution. A biomarker is 'a biological characteristic that is objectively measured and evaluated as an indicator of normal biological processes, pathogenic processes, or pharmacologic responses to a therapeutic intervention'

## Indicators of research activity, output and outcomes

### 16. Do you understand this indicator?

- Yes  
 No

### 17. Feasibility

|                             |                       |                       |                       |                       |                       |                       |                       |                         |
|-----------------------------|-----------------------|-----------------------|-----------------------|-----------------------|-----------------------|-----------------------|-----------------------|-------------------------|
| 1 (definitely not feasible) | 2                     | 3                     | 4                     | 5                     | 6                     | 7                     | 8                     | 9 (definitely feasible) |
| <input type="radio"/>       | <input type="radio"/> | <input type="radio"/> | <input type="radio"/> | <input type="radio"/> | <input type="radio"/> | <input type="radio"/> | <input type="radio"/> | <input type="radio"/>   |

### 18. Validity

|                          |                       |                       |                       |                       |                       |                       |                       |                       |
|--------------------------|-----------------------|-----------------------|-----------------------|-----------------------|-----------------------|-----------------------|-----------------------|-----------------------|
| 1 (definitely not valid) | 2                     | 3                     | 4                     | 5                     | 6                     | 7                     | 8                     | 9 (definitely valid)  |
| <input type="radio"/>    | <input type="radio"/> | <input type="radio"/> | <input type="radio"/> | <input type="radio"/> | <input type="radio"/> | <input type="radio"/> | <input type="radio"/> | <input type="radio"/> |

### 19. Comments

## Indicator : Number of patients in a clinical trial that include biomarker i...

Definition : Number of patients in a clinical trial that include biomarker identification/ number of patients in a clinical trial in a specific year

### 20. Do you understand this indicator?

- Yes  
 No

### 21. Feasibility

|                             |                       |                       |                       |                       |                       |                       |                       |                         |
|-----------------------------|-----------------------|-----------------------|-----------------------|-----------------------|-----------------------|-----------------------|-----------------------|-------------------------|
| 1 (definitely not feasible) | 2                     | 3                     | 4                     | 5                     | 6                     | 7                     | 8                     | 9 (definitely feasible) |
| <input type="radio"/>       | <input type="radio"/> | <input type="radio"/> | <input type="radio"/> | <input type="radio"/> | <input type="radio"/> | <input type="radio"/> | <input type="radio"/> | <input type="radio"/>   |

### 22. Validity

|                          |                       |                       |                       |                       |                       |                       |                       |                       |
|--------------------------|-----------------------|-----------------------|-----------------------|-----------------------|-----------------------|-----------------------|-----------------------|-----------------------|
| 1 (definitely not valid) | 2                     | 3                     | 4                     | 5                     | 6                     | 7                     | 8                     | 9 (definitely valid)  |
| <input type="radio"/>    | <input type="radio"/> | <input type="radio"/> | <input type="radio"/> | <input type="radio"/> | <input type="radio"/> | <input type="radio"/> | <input type="radio"/> | <input type="radio"/> |

### 23. Comments

## Indicator: Number of biospecimen collected

Definition : Number of biospecimens (materials taken from the human body, such as tissue, blood, plasma, and urine) that can be used for cancer diagnosis and analysis) collected in a cancer institution per year

## Indicators of research activity, output and outcomes

### 24. Do you understand this indicator?

- Yes  
 No

### 25. Feasibility

|                             |                       |                       |                       |                       |                       |                       |                       |                         |
|-----------------------------|-----------------------|-----------------------|-----------------------|-----------------------|-----------------------|-----------------------|-----------------------|-------------------------|
| 1 (definitely not feasible) | 2                     | 3                     | 4                     | 5                     | 6                     | 7                     | 8                     | 9 (definitely feasible) |
| <input type="radio"/>       | <input type="radio"/> | <input type="radio"/> | <input type="radio"/> | <input type="radio"/> | <input type="radio"/> | <input type="radio"/> | <input type="radio"/> | <input type="radio"/>   |

### 26. Validity

|                          |                       |                       |                       |                       |                       |                       |                       |                       |
|--------------------------|-----------------------|-----------------------|-----------------------|-----------------------|-----------------------|-----------------------|-----------------------|-----------------------|
| 1 (definitely not valid) | 2                     | 3                     | 4                     | 5                     | 6                     | 7                     | 8                     | 9 (definitely valid)  |
| <input type="radio"/>    | <input type="radio"/> | <input type="radio"/> | <input type="radio"/> | <input type="radio"/> | <input type="radio"/> | <input type="radio"/> | <input type="radio"/> | <input type="radio"/> |

### 27. Comments

## Indicator: Number of diagnostic test created

Number of diagnostic tests developed over a period of 3 years.

### 28. Do you understand this question?

- Yes  
 No

### 29. Feasibility

|                             |                       |                       |                       |                       |                       |                       |                       |                         |
|-----------------------------|-----------------------|-----------------------|-----------------------|-----------------------|-----------------------|-----------------------|-----------------------|-------------------------|
| 1 (definitely not feasible) | 2                     | 3                     | 4                     | 5                     | 6                     | 7                     | 8                     | 9 (definitely feasible) |
| <input type="radio"/>       | <input type="radio"/> | <input type="radio"/> | <input type="radio"/> | <input type="radio"/> | <input type="radio"/> | <input type="radio"/> | <input type="radio"/> | <input type="radio"/>   |

### 30. Validity

|                          |                       |                       |                       |                       |                       |                       |                       |                       |
|--------------------------|-----------------------|-----------------------|-----------------------|-----------------------|-----------------------|-----------------------|-----------------------|-----------------------|
| 1 (definitely not valid) | 2                     | 3                     | 4                     | 5                     | 6                     | 7                     | 8                     | 9 (definitely valid)  |
| <input type="radio"/>    | <input type="radio"/> | <input type="radio"/> | <input type="radio"/> | <input type="radio"/> | <input type="radio"/> | <input type="radio"/> | <input type="radio"/> | <input type="radio"/> |

### 31. Comments

## Indicator: Number of hypotheses generated

Definition : Number of research hypotheses translated in approved research proposals over a period of 3 years

## Indicators of research activity, output and outcomes

### 32. Do you understand this indicator?

- Yes  
 No

### 33. Feasibility

|                             |                       |                       |                       |                       |                       |                       |                       |                         |
|-----------------------------|-----------------------|-----------------------|-----------------------|-----------------------|-----------------------|-----------------------|-----------------------|-------------------------|
| 1 (definitely not feasible) | 2                     | 3                     | 4                     | 5                     | 6                     | 7                     | 8                     | 9 (definitely feasible) |
| <input type="radio"/>       | <input type="radio"/> | <input type="radio"/> | <input type="radio"/> | <input type="radio"/> | <input type="radio"/> | <input type="radio"/> | <input type="radio"/> | <input type="radio"/>   |

### 34. Validity

|                          |                       |                       |                       |                       |                       |                       |                       |                       |
|--------------------------|-----------------------|-----------------------|-----------------------|-----------------------|-----------------------|-----------------------|-----------------------|-----------------------|
| 1 (definitely not valid) | 2                     | 3                     | 4                     | 5                     | 6                     | 7                     | 8                     | 9 (definitely valid)  |
| <input type="radio"/>    | <input type="radio"/> | <input type="radio"/> | <input type="radio"/> | <input type="radio"/> | <input type="radio"/> | <input type="radio"/> | <input type="radio"/> | <input type="radio"/> |

### 35. Comments

## Indicator: Number of assays developed

Definition : Number of assays developed by an institution over the last 3 years

### 36. Do you understand this indicator?

- Yes  
 No

### 37. Feasibility

|                             |                       |                       |                       |                       |                       |                       |                       |                         |
|-----------------------------|-----------------------|-----------------------|-----------------------|-----------------------|-----------------------|-----------------------|-----------------------|-------------------------|
| 1 (definitely not feasible) | 2                     | 3                     | 4                     | 5                     | 6                     | 7                     | 8                     | 9 (definitely feasible) |
| <input type="radio"/>       | <input type="radio"/> | <input type="radio"/> | <input type="radio"/> | <input type="radio"/> | <input type="radio"/> | <input type="radio"/> | <input type="radio"/> | <input type="radio"/>   |

### 38. Validity

|                          |                       |                       |                       |                       |                       |                       |                       |                       |
|--------------------------|-----------------------|-----------------------|-----------------------|-----------------------|-----------------------|-----------------------|-----------------------|-----------------------|
| 1 (definitely not valid) | 2                     | 3                     | 4                     | 5                     | 6                     | 7                     | 8                     | 9 (definitely valid)  |
| <input type="radio"/>    | <input type="radio"/> | <input type="radio"/> | <input type="radio"/> | <input type="radio"/> | <input type="radio"/> | <input type="radio"/> | <input type="radio"/> | <input type="radio"/> |

### 39. Comments

## Indicator: Number of databases generated

Number of research databases created by an institution over a period of 3 years. By database we mean a repository that aggregate clinical and molecular data.

## Indicators of research activity, output and outcomes

### 40. Do you understand this indicator?

Yes

No

### 41. Feasibility

|                             |                       |                       |                       |                       |                       |                       |                       |                         |
|-----------------------------|-----------------------|-----------------------|-----------------------|-----------------------|-----------------------|-----------------------|-----------------------|-------------------------|
| 1 (definitely not feasible) | 2                     | 3                     | 4                     | 5                     | 6                     | 7                     | 8                     | 9 (definitely feasible) |
| <input type="radio"/>       | <input type="radio"/> | <input type="radio"/> | <input type="radio"/> | <input type="radio"/> | <input type="radio"/> | <input type="radio"/> | <input type="radio"/> | <input type="radio"/>   |

### 42. Validity

|                          |                       |                       |                       |                       |                       |                       |                       |                       |
|--------------------------|-----------------------|-----------------------|-----------------------|-----------------------|-----------------------|-----------------------|-----------------------|-----------------------|
| 1 (definitely not valid) | 2                     | 3                     | 4                     | 5                     | 6                     | 7                     | 8                     | 9 (definitely valid)  |
| <input type="radio"/>    | <input type="radio"/> | <input type="radio"/> | <input type="radio"/> | <input type="radio"/> | <input type="radio"/> | <input type="radio"/> | <input type="radio"/> | <input type="radio"/> |

### 43. Comments

## Indicator: Number of research projects ongoing

### 44. Do you understand this indicator?

Yes

No

### 45. Feasibility

|                             |                       |                       |                       |                       |                       |                       |                       |                         |
|-----------------------------|-----------------------|-----------------------|-----------------------|-----------------------|-----------------------|-----------------------|-----------------------|-------------------------|
| 1 (definitely not feasible) | 2                     | 3                     | 4                     | 5                     | 6                     | 7                     | 8                     | 9 (definitely feasible) |
| <input type="radio"/>       | <input type="radio"/> | <input type="radio"/> | <input type="radio"/> | <input type="radio"/> | <input type="radio"/> | <input type="radio"/> | <input type="radio"/> | <input type="radio"/>   |

### 46. Validity

|                          |                       |                       |                       |                       |                       |                       |                       |                       |
|--------------------------|-----------------------|-----------------------|-----------------------|-----------------------|-----------------------|-----------------------|-----------------------|-----------------------|
| 1 (definitely not valid) | 2                     | 3                     | 4                     | 5                     | 6                     | 7                     | 8                     | 9 (definitely valid)  |
| <input type="radio"/>    | <input type="radio"/> | <input type="radio"/> | <input type="radio"/> | <input type="radio"/> | <input type="radio"/> | <input type="radio"/> | <input type="radio"/> | <input type="radio"/> |

### 47. Comments

## Indicator: Number of spin-off companies created

Definition : Number of spin-off created originating from an institution over a period of 3 years

## Indicators of research activity, output and outcomes

### 48. Do you understand this indicator?

Yes

No

### 49. Feasibility

|                             |                       |                       |                       |                       |                       |                       |                       |                         |
|-----------------------------|-----------------------|-----------------------|-----------------------|-----------------------|-----------------------|-----------------------|-----------------------|-------------------------|
| 1 (definitely not feasible) | 2                     | 3                     | 4                     | 5                     | 6                     | 7                     | 8                     | 9 (definitely feasible) |
| <input type="radio"/>       | <input type="radio"/> | <input type="radio"/> | <input type="radio"/> | <input type="radio"/> | <input type="radio"/> | <input type="radio"/> | <input type="radio"/> | <input type="radio"/>   |

### 50. Validity

|                          |                       |                       |                       |                       |                       |                       |                       |                       |
|--------------------------|-----------------------|-----------------------|-----------------------|-----------------------|-----------------------|-----------------------|-----------------------|-----------------------|
| 1 (definitely not valid) | 2                     | 3                     | 4                     | 5                     | 6                     | 7                     | 8                     | 9 (definitely valid)  |
| <input type="radio"/>    | <input type="radio"/> | <input type="radio"/> | <input type="radio"/> | <input type="radio"/> | <input type="radio"/> | <input type="radio"/> | <input type="radio"/> | <input type="radio"/> |

### 51. Comments

## Indicator: Number of visits to the EXPASY server

The EXPASY (Expert Protein Analysis System) is a virtual research infrastructure for bioinformatics. This indicator measures the number of visits to this platform in a specific year

### 52. Do you understand this indicator?

Yes

No

### 53. Feasibility

|                             |                       |                       |                       |                       |                       |                       |                       |                         |
|-----------------------------|-----------------------|-----------------------|-----------------------|-----------------------|-----------------------|-----------------------|-----------------------|-------------------------|
| 1 (definitely not feasible) | 2                     | 3                     | 4                     | 5                     | 6                     | 7                     | 8                     | 9 (definitely feasible) |
| <input type="radio"/>       | <input type="radio"/> | <input type="radio"/> | <input type="radio"/> | <input type="radio"/> | <input type="radio"/> | <input type="radio"/> | <input type="radio"/> | <input type="radio"/>   |

### 54. Validity

|                          |                       |                       |                       |                       |                       |                       |                       |                       |
|--------------------------|-----------------------|-----------------------|-----------------------|-----------------------|-----------------------|-----------------------|-----------------------|-----------------------|
| 1 (definitely not valid) | 2                     | 3                     | 4                     | 5                     | 6                     | 7                     | 8                     | 9 (definitely valid)  |
| <input type="radio"/>    | <input type="radio"/> | <input type="radio"/> | <input type="radio"/> | <input type="radio"/> | <input type="radio"/> | <input type="radio"/> | <input type="radio"/> | <input type="radio"/> |

### 55. Comments

## Indicator selection



## Indicators of research activity, output and outcomes

**\*56. Please select and rank the most important indicators in this category (maximum 5)**

|                                                                              | 1 (Most important indicator of the selection) | 2                     | 3                     | 4                     | 5 (Least important indicator of the selection) |
|------------------------------------------------------------------------------|-----------------------------------------------|-----------------------|-----------------------|-----------------------|------------------------------------------------|
| Number of clinical trials                                                    | <input type="radio"/>                         | <input type="radio"/> | <input type="radio"/> | <input type="radio"/> | <input type="radio"/>                          |
| % of patients included in clinical trial                                     | <input type="radio"/>                         | <input type="radio"/> | <input type="radio"/> | <input type="radio"/> | <input type="radio"/>                          |
| Number of biomarkers identified                                              | <input type="radio"/>                         | <input type="radio"/> | <input type="radio"/> | <input type="radio"/> | <input type="radio"/>                          |
| Number of patients in a clinical trial that include biomarker identification | <input type="radio"/>                         | <input type="radio"/> | <input type="radio"/> | <input type="radio"/> | <input type="radio"/>                          |
| Number of biospecimen collected                                              | <input type="radio"/>                         | <input type="radio"/> | <input type="radio"/> | <input type="radio"/> | <input type="radio"/>                          |
| Number of diagnostic tests developed                                         | <input type="radio"/>                         | <input type="radio"/> | <input type="radio"/> | <input type="radio"/> | <input type="radio"/>                          |
| Number of databases generated                                                | <input type="radio"/>                         | <input type="radio"/> | <input type="radio"/> | <input type="radio"/> | <input type="radio"/>                          |
| Number of hypotheses generated                                               | <input type="radio"/>                         | <input type="radio"/> | <input type="radio"/> | <input type="radio"/> | <input type="radio"/>                          |
| Number of assays developed                                                   | <input type="radio"/>                         | <input type="radio"/> | <input type="radio"/> | <input type="radio"/> | <input type="radio"/>                          |
| Number of research projects ongoing                                          | <input type="radio"/>                         | <input type="radio"/> | <input type="radio"/> | <input type="radio"/> | <input type="radio"/>                          |
| Number of spin-off companies created                                         | <input type="radio"/>                         | <input type="radio"/> | <input type="radio"/> | <input type="radio"/> | <input type="radio"/>                          |
| Number of visits to EXPASY server                                            | <input type="radio"/>                         | <input type="radio"/> | <input type="radio"/> | <input type="radio"/> | <input type="radio"/>                          |

## Indicators of research impact/outcome

Definition: These indicators measure the final impact of research, or how much it results in changes in patients' outcomes, health care organisation, public health...

The feasibility of an indicator refers to the possibility and burden of measuring it. It includes conditions such as data availability, comparability of data across cancer centres and countries, and burden of data collection. The validity of an indicator means its capacity to measure what it is intended to measure.

### Indicator: Citation of research in clinical guidelines

Definition : Number of articles that are cited in clinical guidelines published in the last 5 years

**57. Do you understand this indicator?**

Yes

No

## Indicators of research activity, output and outcomes

### 58. Feasibility

1 (definitely not feasible)      2      3      4      5      6      7      8      9 (definitely feasible)

                                              

### 59. Validity

1 (definitely not valid)      2      3      4      5      6      7      8      9 (definitely valid)

                                              

### 60. Comments

## Indicator: Citation of research in public health guidelines

Definition : Number of articles that are cited in policy or public health guidelines published in the last 5 years

### 61. Do you understand this indicator?

- Yes
- No

### 62. Feasibility

1 (definitely not feasible)      2      3      4      5      6      7      8      9 (definitely feasible)

                                              

### 63. Validity

1 (definitely not valid)      2      3      4      5      6      7      8      9 (definitely valid)

                                              

### 64. Comments

## Indicator: Generation of clinical guidelines

Definition : Number of clinical guidelines published in the last 3 years authored by researchers from an institution

### 65. Do you understand this indicator?

- Yes
- No

## Indicators of research activity, output and outcomes

### 66. Feasibility

|                             |                       |                       |                       |                       |                       |                       |                       |                         |
|-----------------------------|-----------------------|-----------------------|-----------------------|-----------------------|-----------------------|-----------------------|-----------------------|-------------------------|
| 1 (definitely not feasible) | 2                     | 3                     | 4                     | 5                     | 6                     | 7                     | 8                     | 9 (definitely feasible) |
| <input type="radio"/>       | <input type="radio"/> | <input type="radio"/> | <input type="radio"/> | <input type="radio"/> | <input type="radio"/> | <input type="radio"/> | <input type="radio"/> | <input type="radio"/>   |

### 67. Validity

|                          |                       |                       |                       |                       |                       |                       |                       |                       |
|--------------------------|-----------------------|-----------------------|-----------------------|-----------------------|-----------------------|-----------------------|-----------------------|-----------------------|
| 1 (definitely not valid) | 2                     | 3                     | 4                     | 5                     | 6                     | 7                     | 8                     | 9 (definitely valid)  |
| <input type="radio"/>    | <input type="radio"/> | <input type="radio"/> | <input type="radio"/> | <input type="radio"/> | <input type="radio"/> | <input type="radio"/> | <input type="radio"/> | <input type="radio"/> |

### 68. Comments

## Indicator: Changes in clinical practice

Definition : Number of actual changes in clinical practices stimulated by a particular scientific result. We propose to calculate it over a period of 3 years.

### 69. Do you understand this indicator?

- Yes  
 No

### 70. Feasibility

|                             |                       |                       |                       |                       |                       |                       |                       |                         |
|-----------------------------|-----------------------|-----------------------|-----------------------|-----------------------|-----------------------|-----------------------|-----------------------|-------------------------|
| 1 (definitely not feasible) | 2                     | 3                     | 4                     | 5                     | 6                     | 7                     | 8                     | 9 (definitely feasible) |
| <input type="radio"/>       | <input type="radio"/> | <input type="radio"/> | <input type="radio"/> | <input type="radio"/> | <input type="radio"/> | <input type="radio"/> | <input type="radio"/> | <input type="radio"/>   |

### 71. Validity

|                          |                       |                       |                       |                       |                       |                       |                       |                       |
|--------------------------|-----------------------|-----------------------|-----------------------|-----------------------|-----------------------|-----------------------|-----------------------|-----------------------|
| 1 (definitely not valid) | 2                     | 3                     | 4                     | 5                     | 6                     | 7                     | 8                     | 9 (definitely valid)  |
| <input type="radio"/>    | <input type="radio"/> | <input type="radio"/> | <input type="radio"/> | <input type="radio"/> | <input type="radio"/> | <input type="radio"/> | <input type="radio"/> | <input type="radio"/> |

### 72. Comments

## Indicator: Contribution to reports informing policy makers

Definition : Number of policy reports published in the last 3 years written by at least one member of an institution

### 73. Do you understand this indicator?

- Yes  
 No

## Indicators of research activity, output and outcomes

### 74. Feasibility

|                             |                       |                       |                       |                       |                       |                       |                       |                         |
|-----------------------------|-----------------------|-----------------------|-----------------------|-----------------------|-----------------------|-----------------------|-----------------------|-------------------------|
| 1 (definitely not feasible) | 2                     | 3                     | 4                     | 5                     | 6                     | 7                     | 8                     | 9 (definitely feasible) |
| <input type="radio"/>       | <input type="radio"/> | <input type="radio"/> | <input type="radio"/> | <input type="radio"/> | <input type="radio"/> | <input type="radio"/> | <input type="radio"/> | <input type="radio"/>   |

### 75. Validity

|                          |                       |                       |                       |                       |                       |                       |                       |                       |
|--------------------------|-----------------------|-----------------------|-----------------------|-----------------------|-----------------------|-----------------------|-----------------------|-----------------------|
| 1 (definitely not valid) | 2                     | 3                     | 4                     | 5                     | 6                     | 7                     | 8                     | 9 (definitely valid)  |
| <input type="radio"/>    | <input type="radio"/> | <input type="radio"/> | <input type="radio"/> | <input type="radio"/> | <input type="radio"/> | <input type="radio"/> | <input type="radio"/> | <input type="radio"/> |

### 76. Comments

## Indicator: Clinicians' awareness of research results

Definition : Number of clinicians having read articles from an institution published in the last 3 years

### 77. Do you understand this indicator?

- Yes  
 No

### 78. Feasibility

|                             |                       |                       |                       |                       |                       |                       |                       |                         |
|-----------------------------|-----------------------|-----------------------|-----------------------|-----------------------|-----------------------|-----------------------|-----------------------|-------------------------|
| 1 (definitely not feasible) | 2                     | 3                     | 4                     | 5                     | 6                     | 7                     | 8                     | 9 (definitely feasible) |
| <input type="radio"/>       | <input type="radio"/> | <input type="radio"/> | <input type="radio"/> | <input type="radio"/> | <input type="radio"/> | <input type="radio"/> | <input type="radio"/> | <input type="radio"/>   |

### 79. Validity

|                          |                       |                       |                       |                       |                       |                       |                       |                       |
|--------------------------|-----------------------|-----------------------|-----------------------|-----------------------|-----------------------|-----------------------|-----------------------|-----------------------|
| 1 (definitely not valid) | 2                     | 3                     | 4                     | 5                     | 6                     | 7                     | 8                     | 9 (definitely valid)  |
| <input type="radio"/>    | <input type="radio"/> | <input type="radio"/> | <input type="radio"/> | <input type="radio"/> | <input type="radio"/> | <input type="radio"/> | <input type="radio"/> | <input type="radio"/> |

### 80. Comments

## Indicator selection

# Indicators of research activity, output and outcomes

## \*81. Please select and rank the most important indicators in that category (5 max)

|                                                  | 1 (Most important indicator) | 2                     | 3                     | 4                     | 5 (Least important indicator) |
|--------------------------------------------------|------------------------------|-----------------------|-----------------------|-----------------------|-------------------------------|
| Citation of research in clinical guidelines      | <input type="radio"/>        | <input type="radio"/> | <input type="radio"/> | <input type="radio"/> | <input type="radio"/>         |
| Citation of research in public health guidelines | <input type="radio"/>        | <input type="radio"/> | <input type="radio"/> | <input type="radio"/> | <input type="radio"/>         |
| Generation of clinical guidelines                | <input type="radio"/>        | <input type="radio"/> | <input type="radio"/> | <input type="radio"/> | <input type="radio"/>         |
| Changes in clinical practice                     | <input type="radio"/>        | <input type="radio"/> | <input type="radio"/> | <input type="radio"/> | <input type="radio"/>         |
| Contribution to reports informing policy makers  | <input type="radio"/>        | <input type="radio"/> | <input type="radio"/> | <input type="radio"/> | <input type="radio"/>         |
| Clinicians' awareness of research results        | <input type="radio"/>        | <input type="radio"/> | <input type="radio"/> | <input type="radio"/> | <input type="radio"/>         |

## Indicators of collaboration

Definition: Indicators of collaboration measure the level of collaboration or joint work, either between two or more institutions, or between different research units or scientists of different disciplines within the same unit

The feasibility of an indicator refers to the possibility and burden of measuring it. It includes conditions such as data availability, comparability of data across cancer centres and countries, and burden of data collection. The validity of an indicator means its capacity to measure what it is intended to measure.

## Indicator: Partnership Ability Index (PHI-index)

Definition : The PHI index combines the number of co-authors with the frequency of joint activities between him and his co-authors over a period of 3 years

### 82. Do you understand this indicator?

- Yes  
 No

### 83. Feasibility

| 1 (definitely not feasible) | 2                     | 3                     | 4                     | 5                     | 6                     | 7                     | 8                     | 9 (definitely feasible) |
|-----------------------------|-----------------------|-----------------------|-----------------------|-----------------------|-----------------------|-----------------------|-----------------------|-------------------------|
| <input type="radio"/>       | <input type="radio"/> | <input type="radio"/> | <input type="radio"/> | <input type="radio"/> | <input type="radio"/> | <input type="radio"/> | <input type="radio"/> | <input type="radio"/>   |

### 84. Validity

| 1 (definitely not valid) | 2                     | 3                     | 4                     | 5                     | 6                     | 7                     | 8                     | 9 (definitely valid)  |
|--------------------------|-----------------------|-----------------------|-----------------------|-----------------------|-----------------------|-----------------------|-----------------------|-----------------------|
| <input type="radio"/>    | <input type="radio"/> | <input type="radio"/> | <input type="radio"/> | <input type="radio"/> | <input type="radio"/> | <input type="radio"/> | <input type="radio"/> | <input type="radio"/> |

### 85. Comments

# Indicators of research activity, output and outcomes

## Indicator: Number of co-authored publication

Definition : Number of articles that have been co-authored with one or more other institutions (such as hospital) over a period of 3 years

### \*86. Do you understand this indicator?

- Yes  
 No

### 87. Feasibility

|                             |                       |                       |                       |                       |                       |                       |                       |                         |
|-----------------------------|-----------------------|-----------------------|-----------------------|-----------------------|-----------------------|-----------------------|-----------------------|-------------------------|
| 1 (definitely not feasible) | 2                     | 3                     | 4                     | 5                     | 6                     | 7                     | 8                     | 9 (definitely feasible) |
| <input type="radio"/>       | <input type="radio"/> | <input type="radio"/> | <input type="radio"/> | <input type="radio"/> | <input type="radio"/> | <input type="radio"/> | <input type="radio"/> | <input type="radio"/>   |

### 88. Validity

|                          |                       |                       |                       |                       |                       |                       |                       |                       |
|--------------------------|-----------------------|-----------------------|-----------------------|-----------------------|-----------------------|-----------------------|-----------------------|-----------------------|
| 1 (definitely not valid) | 2                     | 3                     | 4                     | 5                     | 6                     | 7                     | 8                     | 9 (definitely valid)  |
| <input type="radio"/>    | <input type="radio"/> | <input type="radio"/> | <input type="radio"/> | <input type="radio"/> | <input type="radio"/> | <input type="radio"/> | <input type="radio"/> | <input type="radio"/> |

### 89. Comments

## Indicator: Number of articles with international collaboration

Definition : The number of publications of an institution that have been co-authored with one or more countries over a period of 3 years

### 90. Do you understand this indicator?

- Yes  
 No

### 91. Feasibility

|                             |                       |                       |                       |                       |                       |                       |                       |                         |
|-----------------------------|-----------------------|-----------------------|-----------------------|-----------------------|-----------------------|-----------------------|-----------------------|-------------------------|
| 1 (definitely not feasible) | 2                     | 3                     | 4                     | 5                     | 6                     | 7                     | 8                     | 9 (definitely feasible) |
| <input type="radio"/>       | <input type="radio"/> | <input type="radio"/> | <input type="radio"/> | <input type="radio"/> | <input type="radio"/> | <input type="radio"/> | <input type="radio"/> | <input type="radio"/>   |

### 92. Validity

|                          |                       |                       |                       |                       |                       |                       |                       |                       |
|--------------------------|-----------------------|-----------------------|-----------------------|-----------------------|-----------------------|-----------------------|-----------------------|-----------------------|
| 1 (definitely not valid) | 2                     | 3                     | 4                     | 5                     | 6                     | 7                     | 8                     | 9 (definitely valid)  |
| <input type="radio"/>    | <input type="radio"/> | <input type="radio"/> | <input type="radio"/> | <input type="radio"/> | <input type="radio"/> | <input type="radio"/> | <input type="radio"/> | <input type="radio"/> |

### 93. Comments

## Indicators of research activity, output and outcomes

### Indicator: Number of articles that involve collaboration between an epidemi...

Definition : Number of publications co-authored by an epidemiologist and a biologist over a period of 3 years

#### 94. Do you understand this indicator?

Yes

No

#### 95. Feasibility

|                             |                       |                       |                       |                       |                       |                       |                       |                         |
|-----------------------------|-----------------------|-----------------------|-----------------------|-----------------------|-----------------------|-----------------------|-----------------------|-------------------------|
| 1 (definitely not feasible) | 2                     | 3                     | 4                     | 5                     | 6                     | 7                     | 8                     | 9 (definitely feasible) |
| <input type="radio"/>       | <input type="radio"/> | <input type="radio"/> | <input type="radio"/> | <input type="radio"/> | <input type="radio"/> | <input type="radio"/> | <input type="radio"/> | <input type="radio"/>   |

#### 96. Validity

|                          |                       |                       |                       |                       |                       |                       |                       |                       |
|--------------------------|-----------------------|-----------------------|-----------------------|-----------------------|-----------------------|-----------------------|-----------------------|-----------------------|
| 1 (definitely not valid) | 2                     | 3                     | 4                     | 5                     | 6                     | 7                     | 8                     | 9 (definitely valid)  |
| <input type="radio"/>    | <input type="radio"/> | <input type="radio"/> | <input type="radio"/> | <input type="radio"/> | <input type="radio"/> | <input type="radio"/> | <input type="radio"/> | <input type="radio"/> |

#### 97. Comments

### Indicator: Proportion of long-distance collaborative publication

Definition : The proportion of the articles published in the last 3 years that have geographical collaboration distance of more than 1000 km

#### 98. Do you understand this indicator?

Yes

No

#### 99. Feasibility

|                             |                       |                       |                       |                       |                       |                       |                       |                         |
|-----------------------------|-----------------------|-----------------------|-----------------------|-----------------------|-----------------------|-----------------------|-----------------------|-------------------------|
| 1 (definitely not feasible) | 2                     | 3                     | 4                     | 5                     | 6                     | 7                     | 8                     | 9 (definitely feasible) |
| <input type="radio"/>       | <input type="radio"/> | <input type="radio"/> | <input type="radio"/> | <input type="radio"/> | <input type="radio"/> | <input type="radio"/> | <input type="radio"/> | <input type="radio"/>   |

#### 100. Validity

|                          |                       |                       |                       |                       |                       |                       |                       |                       |
|--------------------------|-----------------------|-----------------------|-----------------------|-----------------------|-----------------------|-----------------------|-----------------------|-----------------------|
| 1 (definitely not valid) | 2                     | 3                     | 4                     | 5                     | 6                     | 7                     | 8                     | 9 (definitely valid)  |
| <input type="radio"/>    | <input type="radio"/> | <input type="radio"/> | <input type="radio"/> | <input type="radio"/> | <input type="radio"/> | <input type="radio"/> | <input type="radio"/> | <input type="radio"/> |

#### 101. Comments

### Indicator: d-index (dependence degree)

## Indicators of research activity, output and outcomes

Definition : Considering a researcher a1 and his co-author a2. the d-index quantifies how much the productivity of all scientific collaboration of a1 differs when a2 is not involved. We propose to calculate it over a period of 3 years

### 102. Do you understand this indicator?

Yes

No

### 103. Feasibility

|                             |                       |                       |                       |                       |                       |                       |                       |                         |
|-----------------------------|-----------------------|-----------------------|-----------------------|-----------------------|-----------------------|-----------------------|-----------------------|-------------------------|
| 1 (definitely not feasible) | 2                     | 3                     | 4                     | 5                     | 6                     | 7                     | 8                     | 9 (definitely feasible) |
| <input type="radio"/>       | <input type="radio"/> | <input type="radio"/> | <input type="radio"/> | <input type="radio"/> | <input type="radio"/> | <input type="radio"/> | <input type="radio"/> | <input type="radio"/>   |

### 104. Validity

|                          |                       |                       |                       |                       |                       |                       |                       |                       |
|--------------------------|-----------------------|-----------------------|-----------------------|-----------------------|-----------------------|-----------------------|-----------------------|-----------------------|
| 1 (definitely not valid) | 2                     | 3                     | 4                     | 5                     | 6                     | 7                     | 8                     | 9 (definitely valid)  |
| <input type="radio"/>    | <input type="radio"/> | <input type="radio"/> | <input type="radio"/> | <input type="radio"/> | <input type="radio"/> | <input type="radio"/> | <input type="radio"/> | <input type="radio"/> |

### 105. Comments

## Indicator selection

Please select and rank the most important indicators in this category (maximum 5)

### \* 106. Please select and rank the most important indicators in this category

|                                                                                             | 1 (Most important indicator) | 2                     | 3                     | 4 (Least important indicator) |
|---------------------------------------------------------------------------------------------|------------------------------|-----------------------|-----------------------|-------------------------------|
| Partnership Ability Index (PHI-index)                                                       | <input type="radio"/>        | <input type="radio"/> | <input type="radio"/> | <input type="radio"/>         |
| Number of co-authored publication                                                           | <input type="radio"/>        | <input type="radio"/> | <input type="radio"/> | <input type="radio"/>         |
| Number of articles with international collaboration                                         | <input type="radio"/>        | <input type="radio"/> | <input type="radio"/> | <input type="radio"/>         |
| Number of publications that involve collaboration between an epidemiologist and a biologist | <input type="radio"/>        | <input type="radio"/> | <input type="radio"/> | <input type="radio"/>         |
| d-index                                                                                     | <input type="radio"/>        | <input type="radio"/> | <input type="radio"/> | <input type="radio"/>         |

## Indicators of dissemination

Definition: Indicators of dissemination measure the way the research results are disseminated or communicated towards the society (or the scientific community)



# Indicators of research activity, output and outcomes

The feasibility of an indicator refers to the possibility and burden of measuring it. It includes conditions such as data availability, comparability of data across cancer centres and countries, and burden of data collection. The validity of an indicator means its capacity to measure what it is intended to measure.

## Indicator: Citation in medical education books

Definition : Number of articles written by an institution cited in medical education books over a period of 3 years

### 107. Do you understand this indicator?

Yes

No

### 108. Feasibility

|                             |                       |                       |                       |                       |                       |                       |                       |                         |
|-----------------------------|-----------------------|-----------------------|-----------------------|-----------------------|-----------------------|-----------------------|-----------------------|-------------------------|
| 1 (definitely not feasible) | 2                     | 3                     | 4                     | 5                     | 6                     | 7                     | 8                     | 9 (definitely feasible) |
| <input type="radio"/>       | <input type="radio"/> | <input type="radio"/> | <input type="radio"/> | <input type="radio"/> | <input type="radio"/> | <input type="radio"/> | <input type="radio"/> | <input type="radio"/>   |

### 109. Validity

|                          |                       |                       |                       |                       |                       |                       |                       |                       |
|--------------------------|-----------------------|-----------------------|-----------------------|-----------------------|-----------------------|-----------------------|-----------------------|-----------------------|
| 1 (definitely not valid) | 2                     | 3                     | 4                     | 5                     | 6                     | 7                     | 8                     | 9 (definitely valid)  |
| <input type="radio"/>    | <input type="radio"/> | <input type="radio"/> | <input type="radio"/> | <input type="radio"/> | <input type="radio"/> | <input type="radio"/> | <input type="radio"/> | <input type="radio"/> |

### 110. Comments

## Indicator: Number of presentations at key selected conference

Definition : Number of presentations at key selected conference by the institution over a period of 3 years

### 111. Do you understand this indicator?

Yes

No

### 112. Feasibility

|                             |                       |                       |                       |                       |                       |                       |                       |                         |
|-----------------------------|-----------------------|-----------------------|-----------------------|-----------------------|-----------------------|-----------------------|-----------------------|-------------------------|
| 1 (definitely not feasible) | 2                     | 3                     | 4                     | 5                     | 6                     | 7                     | 8                     | 9 (definitely feasible) |
| <input type="radio"/>       | <input type="radio"/> | <input type="radio"/> | <input type="radio"/> | <input type="radio"/> | <input type="radio"/> | <input type="radio"/> | <input type="radio"/> | <input type="radio"/>   |

### 113. Validity

|                          |                       |                       |                       |                       |                       |                       |                       |                       |
|--------------------------|-----------------------|-----------------------|-----------------------|-----------------------|-----------------------|-----------------------|-----------------------|-----------------------|
| 1 (definitely not valid) | 2                     | 3                     | 4                     | 5                     | 6                     | 7                     | 8                     | 9 (definitely valid)  |
| <input type="radio"/>    | <input type="radio"/> | <input type="radio"/> | <input type="radio"/> | <input type="radio"/> | <input type="radio"/> | <input type="radio"/> | <input type="radio"/> | <input type="radio"/> |

## Indicators of research activity, output and outcomes

### 114. Comments

### Indicator: Number of conference held

Definition : Number of conference held by the institution over a period of 3 years

### 115. Do you understand this indicator?

Yes

No

### 116. Feasibility

|                             |                       |                       |                       |                       |                       |                       |                       |                         |
|-----------------------------|-----------------------|-----------------------|-----------------------|-----------------------|-----------------------|-----------------------|-----------------------|-------------------------|
| 1 (definitely not feasible) | 2                     | 3                     | 4                     | 5                     | 6                     | 7                     | 8                     | 9 (definitely feasible) |
| <input type="radio"/>       | <input type="radio"/> | <input type="radio"/> | <input type="radio"/> | <input type="radio"/> | <input type="radio"/> | <input type="radio"/> | <input type="radio"/> | <input type="radio"/>   |

### 117. Validity

|                          |                       |                       |                       |                       |                       |                       |                       |                       |
|--------------------------|-----------------------|-----------------------|-----------------------|-----------------------|-----------------------|-----------------------|-----------------------|-----------------------|
| 1 (definitely not valid) | 2                     | 3                     | 4                     | 5                     | 6                     | 7                     | 8                     | 9 (definitely valid)  |
| <input type="radio"/>    | <input type="radio"/> | <input type="radio"/> | <input type="radio"/> | <input type="radio"/> | <input type="radio"/> | <input type="radio"/> | <input type="radio"/> | <input type="radio"/> |

### 118. Comments

### Indicator: Reporting of research in the news/media

Definition : Number of articles cited in the mass media over a period of 3 years

### 119. Do you understand this indicator?

Yes

No

### 120. Feasibility

|                             |                       |                       |                       |                       |                       |                       |                       |                         |
|-----------------------------|-----------------------|-----------------------|-----------------------|-----------------------|-----------------------|-----------------------|-----------------------|-------------------------|
| 1 (definitely not feasible) | 2                     | 3                     | 4                     | 5                     | 6                     | 7                     | 8                     | 9 (definitely feasible) |
| <input type="radio"/>       | <input type="radio"/> | <input type="radio"/> | <input type="radio"/> | <input type="radio"/> | <input type="radio"/> | <input type="radio"/> | <input type="radio"/> | <input type="radio"/>   |

### 121. Validity

|                          |                       |                       |                       |                       |                       |                       |                       |                       |
|--------------------------|-----------------------|-----------------------|-----------------------|-----------------------|-----------------------|-----------------------|-----------------------|-----------------------|
| 1 (definitely not valid) | 2                     | 3                     | 4                     | 5                     | 6                     | 7                     | 8                     | 9 (definitely valid)  |
| <input type="radio"/>    | <input type="radio"/> | <input type="radio"/> | <input type="radio"/> | <input type="radio"/> | <input type="radio"/> | <input type="radio"/> | <input type="radio"/> | <input type="radio"/> |

## Indicators of research activity, output and outcomes

### 122. Comments

### Indicator selection

#### \*123. Please select and rank the most important indicators in that category

|                                                    | 1 (Most important indicator) | 2                     | 3                     | 4 (Least important indicator) |
|----------------------------------------------------|------------------------------|-----------------------|-----------------------|-------------------------------|
| Citation in medical education books                | <input type="radio"/>        | <input type="radio"/> | <input type="radio"/> | <input type="radio"/>         |
| Number of presentations at key selected conference | <input type="radio"/>        | <input type="radio"/> | <input type="radio"/> | <input type="radio"/>         |
| Number of conference held                          | <input type="radio"/>        | <input type="radio"/> | <input type="radio"/> | <input type="radio"/>         |
| Reporting of research in the news/media            | <input type="radio"/>        | <input type="radio"/> | <input type="radio"/> | <input type="radio"/>         |

### Indicators of industrial production

Definition: Indicators of industrial production measure the outcomes of the collaborative activities between biomedical industries and research centres

The feasibility of an indicator refers to the possibility and burden of measuring it. It includes conditions such as data availability, comparability of data across cancer centres and countries, and burden of data collection. The validity of an indicator means its capacity to measure what it is intended to measure.

### Indicator: Number of public-private partnerships

Definition : Number of public-private partnership. A public-private partnership is a long term agreement between an academic research institute and an industrial partner

#### 124. Do you understand this indicator?

- Yes
- No

#### 125. Feasibility

| 1 (definitely not feasible) | 2                     | 3                     | 4                     | 5                     | 6                     | 7                     | 8                     | 9 (definitely feasible) |
|-----------------------------|-----------------------|-----------------------|-----------------------|-----------------------|-----------------------|-----------------------|-----------------------|-------------------------|
| <input type="radio"/>       | <input type="radio"/> | <input type="radio"/> | <input type="radio"/> | <input type="radio"/> | <input type="radio"/> | <input type="radio"/> | <input type="radio"/> | <input type="radio"/>   |

#### 126. Validity

| 1 (definitely not valid) | 2                     | 3                     | 4                     | 5                     | 6                     | 7                     | 8                     | 9 (definitely valid)  |
|--------------------------|-----------------------|-----------------------|-----------------------|-----------------------|-----------------------|-----------------------|-----------------------|-----------------------|
| <input type="radio"/>    | <input type="radio"/> | <input type="radio"/> | <input type="radio"/> | <input type="radio"/> | <input type="radio"/> | <input type="radio"/> | <input type="radio"/> | <input type="radio"/> |

# Indicators of research activity, output and outcomes

## 127. Comments

## Indicator: Number of papers co-authored with the industry

Definition : Number of articles published by an institution over a period of 3 years that include at least one author affiliated to a health industry

### 128. Do you understand this indicator?

Yes

No

### 129. Feasibility

|                             |                       |                       |                       |                       |                       |                       |                       |                         |
|-----------------------------|-----------------------|-----------------------|-----------------------|-----------------------|-----------------------|-----------------------|-----------------------|-------------------------|
| 1 (definitely not feasible) | 2                     | 3                     | 4                     | 5                     | 6                     | 7                     | 8                     | 9 (definitely feasible) |
| <input type="radio"/>       | <input type="radio"/> | <input type="radio"/> | <input type="radio"/> | <input type="radio"/> | <input type="radio"/> | <input type="radio"/> | <input type="radio"/> | <input type="radio"/>   |

### 130. Validity

|                          |                       |                       |                       |                       |                       |                       |                       |                       |
|--------------------------|-----------------------|-----------------------|-----------------------|-----------------------|-----------------------|-----------------------|-----------------------|-----------------------|
| 1 (definitely not valid) | 2                     | 3                     | 4                     | 5                     | 6                     | 7                     | 8                     | 9 (definitely valid)  |
| <input type="radio"/>    | <input type="radio"/> | <input type="radio"/> | <input type="radio"/> | <input type="radio"/> | <input type="radio"/> | <input type="radio"/> | <input type="radio"/> | <input type="radio"/> |

### 131. Comments

## Indicator: Number of patents

Definition : Number of patents applied for or approved over a period of 3 years

### 132. Do you understand this indicator?

Yes

No

### 133. Feasibility

|                             |                       |                       |                       |                       |                       |                       |                       |                         |
|-----------------------------|-----------------------|-----------------------|-----------------------|-----------------------|-----------------------|-----------------------|-----------------------|-------------------------|
| 1 (definitely not feasible) | 2                     | 3                     | 4                     | 5                     | 6                     | 7                     | 8                     | 9 (definitely feasible) |
| <input type="radio"/>       | <input type="radio"/> | <input type="radio"/> | <input type="radio"/> | <input type="radio"/> | <input type="radio"/> | <input type="radio"/> | <input type="radio"/> | <input type="radio"/>   |

### 134. Validity

|                          |                       |                       |                       |                       |                       |                       |                       |                       |
|--------------------------|-----------------------|-----------------------|-----------------------|-----------------------|-----------------------|-----------------------|-----------------------|-----------------------|
| 1 (definitely not valid) | 2                     | 3                     | 4                     | 5                     | 6                     | 7                     | 8                     | 9 (definitely valid)  |
| <input type="radio"/>    | <input type="radio"/> | <input type="radio"/> | <input type="radio"/> | <input type="radio"/> | <input type="radio"/> | <input type="radio"/> | <input type="radio"/> | <input type="radio"/> |

## Indicators of research activity, output and outcomes

### 135. Comments

### Indicator: Number of patent citations

Definition : Number of patents from an institutions that are cited in subsequent patent applications in the last 3 years

### 136. Do you understand this indicator?

Yes

No

### 137. Feasibility

|                             |                       |                       |                       |                       |                       |                       |                       |                         |
|-----------------------------|-----------------------|-----------------------|-----------------------|-----------------------|-----------------------|-----------------------|-----------------------|-------------------------|
| 1 (definitely not feasible) | 2                     | 3                     | 4                     | 5                     | 6                     | 7                     | 8                     | 9 (definitely feasible) |
| <input type="radio"/>       | <input type="radio"/> | <input type="radio"/> | <input type="radio"/> | <input type="radio"/> | <input type="radio"/> | <input type="radio"/> | <input type="radio"/> | <input type="radio"/>   |

### 138. Validity

|                          |                       |                       |                       |                       |                       |                       |                       |                       |
|--------------------------|-----------------------|-----------------------|-----------------------|-----------------------|-----------------------|-----------------------|-----------------------|-----------------------|
| 1 (definitely not valid) | 2                     | 3                     | 4                     | 5                     | 6                     | 7                     | 8                     | 9 (definitely valid)  |
| <input type="radio"/>    | <input type="radio"/> | <input type="radio"/> | <input type="radio"/> | <input type="radio"/> | <input type="radio"/> | <input type="radio"/> | <input type="radio"/> | <input type="radio"/> |

### 139. Comments

### Indicator: Patent h-index

Definition : Indicator that combines the number of patents and the patent citation count over a period of 3 years

### 140. Do you understand this indicator?

Yes

No

### 141. Feasibility

|                             |                       |                       |                       |                       |                       |                       |                       |                         |
|-----------------------------|-----------------------|-----------------------|-----------------------|-----------------------|-----------------------|-----------------------|-----------------------|-------------------------|
| 1 (definitely not feasible) | 2                     | 3                     | 4                     | 5                     | 6                     | 7                     | 8                     | 9 (definitely feasible) |
| <input type="radio"/>       | <input type="radio"/> | <input type="radio"/> | <input type="radio"/> | <input type="radio"/> | <input type="radio"/> | <input type="radio"/> | <input type="radio"/> | <input type="radio"/>   |

### 142. Validity

|                          |                       |                       |                       |                       |                       |                       |                       |                       |
|--------------------------|-----------------------|-----------------------|-----------------------|-----------------------|-----------------------|-----------------------|-----------------------|-----------------------|
| 1 (definitely not valid) | 2                     | 3                     | 4                     | 5                     | 6                     | 7                     | 8                     | 9 (definitely valid)  |
| <input type="radio"/>    | <input type="radio"/> | <input type="radio"/> | <input type="radio"/> | <input type="radio"/> | <input type="radio"/> | <input type="radio"/> | <input type="radio"/> | <input type="radio"/> |

## Indicators of research activity, output and outcomes

### 143. Comments

### Indicator: Citation of research in patents

Definition : Number of patents applied for in the last 3 years that cite research produced by an institution

### 144. Do you understand this indicator?

Yes

No

### 145. Feasibility

|                             |                       |                       |                       |                       |                       |                       |                       |                         |
|-----------------------------|-----------------------|-----------------------|-----------------------|-----------------------|-----------------------|-----------------------|-----------------------|-------------------------|
| 1 (definitely not feasible) | 2                     | 3                     | 4                     | 5                     | 6                     | 7                     | 8                     | 9 (definitely feasible) |
| <input type="radio"/>       | <input type="radio"/> | <input type="radio"/> | <input type="radio"/> | <input type="radio"/> | <input type="radio"/> | <input type="radio"/> | <input type="radio"/> | <input type="radio"/>   |

### 146. Validity

|                          |                       |                       |                       |                       |                       |                       |                       |                       |
|--------------------------|-----------------------|-----------------------|-----------------------|-----------------------|-----------------------|-----------------------|-----------------------|-----------------------|
| 1 (definitely not valid) | 2                     | 3                     | 4                     | 5                     | 6                     | 7                     | 8                     | 9 (definitely valid)  |
| <input type="radio"/>    | <input type="radio"/> | <input type="radio"/> | <input type="radio"/> | <input type="radio"/> | <input type="radio"/> | <input type="radio"/> | <input type="radio"/> | <input type="radio"/> |

### 147. Comments

### Indicator selection

#### \*148. Please select and rank the most important indicators in that category (max. 5)

|                                                | 1 (Most important indicator) | 2                     | 3                     | 4                     | 5 (Least important indicator) |
|------------------------------------------------|------------------------------|-----------------------|-----------------------|-----------------------|-------------------------------|
| Number of public-private partnerships          | <input type="radio"/>        | <input type="radio"/> | <input type="radio"/> | <input type="radio"/> | <input type="radio"/>         |
| Number of papers co-authored with the industry | <input type="radio"/>        | <input type="radio"/> | <input type="radio"/> | <input type="radio"/> | <input type="radio"/>         |
| Number of patents                              | <input type="radio"/>        | <input type="radio"/> | <input type="radio"/> | <input type="radio"/> | <input type="radio"/>         |
| Number of patent citations                     | <input type="radio"/>        | <input type="radio"/> | <input type="radio"/> | <input type="radio"/> | <input type="radio"/>         |
| Patent h-index                                 | <input type="radio"/>        | <input type="radio"/> | <input type="radio"/> | <input type="radio"/> | <input type="radio"/>         |
| Citation of research in patents                | <input type="radio"/>        | <input type="radio"/> | <input type="radio"/> | <input type="radio"/> | <input type="radio"/>         |

### Bibliometric indicators

Definition: Bibliometric indicators measure the production of a research institute based on their publication record

# Indicators of research activity, output and outcomes

The feasibility of an indicator refers to the possibility and burden of measuring it. It includes conditions such as data availability, comparability of data across cancer centres and countries, and burden of data collection. The validity of an indicator means its capacity to measure what it is intended to measure.

## Indicator: Number of publications

Definition : Number of peer-reviewed publications authored by the institution over a period of 3 years

### 149. Do you understand this indicator?

Yes

No

### 150. Feasibility

|                             |                       |                       |                       |                       |                       |                       |                       |                         |
|-----------------------------|-----------------------|-----------------------|-----------------------|-----------------------|-----------------------|-----------------------|-----------------------|-------------------------|
| 1 (definitely not feasible) | 2                     | 3                     | 4                     | 5                     | 6                     | 7                     | 8                     | 9 (definitely feasible) |
| <input type="radio"/>       | <input type="radio"/> | <input type="radio"/> | <input type="radio"/> | <input type="radio"/> | <input type="radio"/> | <input type="radio"/> | <input type="radio"/> | <input type="radio"/>   |

### 151. Validity

|                          |                       |                       |                       |                       |                       |                       |                       |                       |
|--------------------------|-----------------------|-----------------------|-----------------------|-----------------------|-----------------------|-----------------------|-----------------------|-----------------------|
| 1 (definitely not valid) | 2                     | 3                     | 4                     | 5                     | 6                     | 7                     | 8                     | 9 (definitely valid)  |
| <input type="radio"/>    | <input type="radio"/> | <input type="radio"/> | <input type="radio"/> | <input type="radio"/> | <input type="radio"/> | <input type="radio"/> | <input type="radio"/> | <input type="radio"/> |

### 152. Comments

## Indicator: Number of citations

Definition : Number of citations received by a group of researchers from published articles over the last 3 years

### 153. Do you understand this indicator?

Yes

No

### 154. Feasibility

|                             |                       |                       |                       |                       |                       |                       |                       |                         |
|-----------------------------|-----------------------|-----------------------|-----------------------|-----------------------|-----------------------|-----------------------|-----------------------|-------------------------|
| 1 (definitely not feasible) | 2                     | 3                     | 4                     | 5                     | 6                     | 7                     | 8                     | 9 (definitely feasible) |
| <input type="radio"/>       | <input type="radio"/> | <input type="radio"/> | <input type="radio"/> | <input type="radio"/> | <input type="radio"/> | <input type="radio"/> | <input type="radio"/> | <input type="radio"/>   |

### 155. Validity

|                          |                       |                       |                       |                       |                       |                       |                       |                       |
|--------------------------|-----------------------|-----------------------|-----------------------|-----------------------|-----------------------|-----------------------|-----------------------|-----------------------|
| 1 (definitely not valid) | 2                     | 3                     | 4                     | 5                     | 6                     | 7                     | 8                     | 9 (definitely valid)  |
| <input type="radio"/>    | <input type="radio"/> | <input type="radio"/> | <input type="radio"/> | <input type="radio"/> | <input type="radio"/> | <input type="radio"/> | <input type="radio"/> | <input type="radio"/> |

## Indicators of research activity, output and outcomes

### 156. Comments

### Indicator: Mean citations per article

Definition : The mean number of citation per articles published in the last 3 years

### 157. Do you understand this indicator?

Yes

No

### 158. Feasibility

|                             |                       |                       |                       |                       |                       |                       |                       |                         |
|-----------------------------|-----------------------|-----------------------|-----------------------|-----------------------|-----------------------|-----------------------|-----------------------|-------------------------|
| 1 (definitely not feasible) | 2                     | 3                     | 4                     | 5                     | 6                     | 7                     | 8                     | 9 (definitely feasible) |
| <input type="radio"/>       | <input type="radio"/> | <input type="radio"/> | <input type="radio"/> | <input type="radio"/> | <input type="radio"/> | <input type="radio"/> | <input type="radio"/> | <input type="radio"/>   |

### 159. Validity

|                          |                       |                       |                       |                       |                       |                       |                       |                       |
|--------------------------|-----------------------|-----------------------|-----------------------|-----------------------|-----------------------|-----------------------|-----------------------|-----------------------|
| 1 (definitely not valid) | 2                     | 3                     | 4                     | 5                     | 6                     | 7                     | 8                     | 9 (definitely valid)  |
| <input type="radio"/>    | <input type="radio"/> | <input type="radio"/> | <input type="radio"/> | <input type="radio"/> | <input type="radio"/> | <input type="radio"/> | <input type="radio"/> | <input type="radio"/> |

### 160. Comments

### Indicator: H-index for institutions

Definition : The h-index combines the number of articles produced by a research units and the number of its citations. We propose to calculate it over a period of 3 years

### 161. Do you understand this indicator?

Yes

No

### 162. Feasibility

|                             |                       |                       |                       |                       |                       |                       |                       |                         |
|-----------------------------|-----------------------|-----------------------|-----------------------|-----------------------|-----------------------|-----------------------|-----------------------|-------------------------|
| 1 (definitely not feasible) | 2                     | 3                     | 4                     | 5                     | 6                     | 7                     | 8                     | 9 (definitely feasible) |
| <input type="radio"/>       | <input type="radio"/> | <input type="radio"/> | <input type="radio"/> | <input type="radio"/> | <input type="radio"/> | <input type="radio"/> | <input type="radio"/> | <input type="radio"/>   |

### 163. Validity

|                          |                       |                       |                       |                       |                       |                       |                       |                       |
|--------------------------|-----------------------|-----------------------|-----------------------|-----------------------|-----------------------|-----------------------|-----------------------|-----------------------|
| 1 (definitely not valid) | 2                     | 3                     | 4                     | 5                     | 6                     | 7                     | 8                     | 9 (definitely valid)  |
| <input type="radio"/>    | <input type="radio"/> | <input type="radio"/> | <input type="radio"/> | <input type="radio"/> | <input type="radio"/> | <input type="radio"/> | <input type="radio"/> | <input type="radio"/> |



## Indicators of research activity, output and outcomes

### 164. Comments

### Indicator: Journal impact factor

Definition : The journal impact factor is the ratio of the number of citations to number of citable items of a journal over a period of 2 years. We propose to calculate the mean impact factor of publications by an institutions over a period of 3 years.

### 165. Do you understand this indicator?

- Yes  
 No

### 166. Feasibility

|                             |                       |                       |                       |                       |                       |                       |                       |                         |
|-----------------------------|-----------------------|-----------------------|-----------------------|-----------------------|-----------------------|-----------------------|-----------------------|-------------------------|
| 1 (definitely not feasible) | 2                     | 3                     | 4                     | 5                     | 6                     | 7                     | 8                     | 9 (definitely feasible) |
| <input type="radio"/>       | <input type="radio"/> | <input type="radio"/> | <input type="radio"/> | <input type="radio"/> | <input type="radio"/> | <input type="radio"/> | <input type="radio"/> | <input type="radio"/>   |

### 167. Validity

|                          |                       |                       |                       |                       |                       |                       |                       |                       |
|--------------------------|-----------------------|-----------------------|-----------------------|-----------------------|-----------------------|-----------------------|-----------------------|-----------------------|
| 1 (definitely not valid) | 2                     | 3                     | 4                     | 5                     | 6                     | 7                     | 8                     | 9 (definitely valid)  |
| <input type="radio"/>    | <input type="radio"/> | <input type="radio"/> | <input type="radio"/> | <input type="radio"/> | <input type="radio"/> | <input type="radio"/> | <input type="radio"/> | <input type="radio"/> |

### 168. Comments

### Indicator: z-factor

Definition : The z-index takes into account both the number of publications and the impact factor of the journals in which they are published. We propose to calculate it over a period of 3 years

### 169. Do you understand this indicator?

- Yes  
 No

### 170. Feasibility

|                             |                       |                       |                       |                       |                       |                       |                       |                         |
|-----------------------------|-----------------------|-----------------------|-----------------------|-----------------------|-----------------------|-----------------------|-----------------------|-------------------------|
| 1 (definitely not feasible) | 2                     | 3                     | 4                     | 5                     | 6                     | 7                     | 8                     | 9 (definitely feasible) |
| <input type="radio"/>       | <input type="radio"/> | <input type="radio"/> | <input type="radio"/> | <input type="radio"/> | <input type="radio"/> | <input type="radio"/> | <input type="radio"/> | <input type="radio"/>   |

## Indicators of research activity, output and outcomes

### 171. Validity

1 (definitely not valid)      2      3      4      5      6      7      8      9 (definitely valid)

                                              

### 172. Comments

## Indicator: Number of publications in top-ranked journals

Definition : Number of publications in highest quality journals of the discipline according to their impact factor. We propose to calculate it over a period of 3 years

### 173. Do you understand this indicator?

Yes

No

### 174. Feasibility

1 (definitely not feasible)      2      3      4      5      6      7      8      9 (definitely feasible)

                                              

### 175. Validity

1 (definitely not valid)      2      3      4      5      6      7      8      9 (definitely valid)

                                              

### 176. Comments

## Indicator: Number of highly cited publications

Definition : Number of articles produced by an institution that have a citation count above a certain threshold over a period of 3 years.

### 177. Do you understand this indicator?

Yes

No

### 178. Feasibility

1 (definitely not feasible)      2      3      4      5      6      7      8      9 (definitely feasible)

## Indicators of research activity, output and outcomes

### 179. Validity

1 (definitely not valid)      2      3      4      5      6      7      8      9 (definitely valid)

                                              

### 180. Comments

## Indicator: Crown indicator

Definition : Average number of received citations divided by the average number that could be expected for publication of the same type published on journals of the same type. We propose to calculate it over a period of 3 years

### 181. Do you understand this indicator?

Yes

No

### 182. Feasibility

1 (definitely not feasible)      2      3      4      5      6      7      8      9 (definitely feasible)

                                              

### 183. Validity

1 (definitely not valid)      2      3      4      5      6      7      8      9 (definitely valid)

                                              

### 184. Comments

## Indicator: SP-index

Definition : Index that incorporates number of papers, number of citations and impact factor of publications. We propose to calculate it over a period of 3 years

### 185. Do you understand this indicator?

Yes

No

### 186. Feasibility

1 (definitely not feasible)      2      3      4      5      6      7      8      9 (definitely feasible)

## Indicators of research activity, output and outcomes

### 187. Validity

1 (definitely not valid)      2      3      4      5      6      7      8      9 (definitely valid)

                                              

### 188. Comments

## Indicator: b-index

Definition : Number of papers of a scientist that belong to the top 10% of papers in that field. We propose to calculate it over a period of 3 years

### 189. Do you understand this indicator?

- Yes  
 No

### 190. Feasibility

1 (definitely not feasible)      2      3      4      5      6      7      8      9 (definitely feasible)

                                              

### 191. Validity

1 (definitely not valid)      2      3      4      5      6      7      8      9 (definitely valid)

                                              

### 192. Comments

## Indicator: Mean citations per papers

Definition : The mean of citation per articles in the last 3 years.

### 193. Do you understand this indicator?

- Yes  
 No

### 194. Feasibility

1 (definitely not feasible)      2      3      4      5      6      7      8      9 (definitely feasible)

# Indicators of research activity, output and outcomes

## 195. Validity

definitely not  
valid

definitely valid

## 196. Comments

## Indicator: j-index

Definition : The j-index is derived from the h-index but also takes into account excess of publications in the h-core and the distribution of citations. We propose to calculate it over a period of 3 years

## 197. Do you understand this indicator?

Yes

No

## 198. Feasibility

1 (definitely not  
feasible)

2

3

4

5

6

7

8

9 (definitely  
feasible)

## 199. Validity

1 (definitely not  
valid)

2

3

4

5

6

7

8

9 (definitely  
valid)

## 200. Comments

## Indicator: e-index

Definition : An h-index with ignored excess citations. We propose to calculate it over a period of 3 years

## 201. Do you understand this indicator?

Yes

No

## 202. Feasibility

1 (definitely not  
feasible)

2

3

4

5

6

7

8

9 (definitely  
feasible)

## Indicators of research activity, output and outcomes

### 203. Validity

1 (definitely not valid)      2      3      4      5      6      7      8      9 (definitely valid)

                              

### 204. Comments

## Indicator: w-index

Definition : If all the papers of a scientist are ranked in descending order of the number of citations they received, the w-index is the highest number of papers one has that have each received at least 10w or more citations

### 205. Do you understand this indicator?

Yes

No

### 206. Feasibility

1 (definitely not feasible)      2      3      4      5      6      7      8      9 (definitely feasible)

                              

### 207. Validity

1 (definitely not valid)      2      3      4      5      6      7      8      9 (definitely valid)

                              

### 208. Comments

## Indicator: Central index

Definition : Indicator that corrects biases of mass collaboration and punctual success by not considering all production and impact

### 209. Do you understand this indicator?

Yes

No

### 210. Feasibility

1 (definitely not feasible)      2      3      4      5      6      7      8      9 (definitely feasible)

## Indicators of research activity, output and outcomes

### 211. Validity

1 (definitely not valid)      2      3      4      5      6      7      8      9 (definitely valid)

                                              

### 212. Comments

## Indicator: x-index

Definition : Index calculated from the number of national articles in top 1% and 0.1% of highly cited articles over a period of 3 years.

### 213. Do you understand this indicator?

- Yes  
 No

### 214. Feasibility

1 (definitely not feasible)      2      3      4      5      6      7      8      9 (definitely feasible)

                                              

### 215. Validity

1 (definitely not valid)      2      3      4      5      6      7      8      9 (definitely valid)

                                              

### 216. Comments

## Indicator: m-index

Definition : The median number of citations received by papers that have a ranking that is equal to or smaller than h

### 217. Do you understand this indicator?

- Yes  
 No

### 218. Feasibility

1 (definitely not feasible)      2      3      4      5      6      7      8      9 (definitely feasible)

## Indicators of research activity, output and outcomes

### 219. Validity

1 (definitely not valid)      2      3      4      5      6      7      8      9 (definitely valid)

                                              

### 220. Comments

## Indicator: Q<sup>2</sup> index

Definition : The q2 index is the geometric mean of the h-index and the m-index, defined as the square root of the product of the h- and m- indices. We propose to calculate it over a period of 3 years

### 221. Do you understand this indicator?

- Yes  
 No

### 222. Feasibility

1 (definitely not feasible)      2      3      4      5      6      7      8      9 (definitely feasible)

                                              

### 223. Validity

1 (definitely not valid)      2      3      4      5      6      7      8      9 (definitely valid)

                                              

### 224. Comments

## Indicator: m-quotient

Definition : h-index adjusted for the researcher's career length. We propose to calculate it over a period of 3 years

### 225. Do you understand this indicator?

- Yes  
 No

### 226. Feasibility

1 (definitely not feasible)      2      3      4      5      6      7      8      9 (definitely feasible)



## Indicators of research activity, output and outcomes

### 227. Validity

1 (definitely not valid)      2      3      4      5      6      7      8      9 (definitely valid)

                                              

### 228. Comments

## Indicator: AWCR (age-weighted citation ratio)

Definition : The average number of citations for an entire body of work adjusted for the age of each individual paper. We propose to calculate it over a period of 3 years

### 229. Do you understand this indicator?

- Yes  
 No

### 230. Feasibility

1 (definitely not feasible)      2      3      4      5      6      7      8      9 (definitely feasible)

                                              

### 231. Validity

1 (definitely not valid)      2      3      4      5      6      7      8      9 (definitely valid)

                                              

### 232. Comments

## Indicator: Mean normalised citation score

Definition : Average number of citations of publications of a university, normalised for differences between scientific fields, between publication years, and document types. We propose to calculate it over a period of 3 years

### 233. Do you understand this indicator?

- Yes  
 No

### 234. Feasibility

1 (definitely not feasible)      2      3      4      5      6      7      8      9 (definitely feasible)

## Indicators of research activity, output and outcomes

### 235. Validity

1 (definitely not valid)      2      3      4      5      6      7      8      9 (definitely valid)

                                              

### 236. Comments

## Indicator: Citer h-index (Ch-index)

Definition : The number such that for a general group of papers, ch papers are cited by no more than ch different citers

### 237. Do you understand this indicator?

- Yes  
 No

### 238. Feasibility

1 (definitely not feasible)      2      3      4      5      6      7      8      9 (definitely feasible)

                                              

### 239. Validity

1 (definitely not valid)      2      3      4      5      6      7      8      9 (definitely valid)

                                              

### 240. Comments

## Indicator: r-index

Definition : h-index revised by weighting four times more the first and last authors. We propose to calculate it over a period of 3 years

### 241. Do you understand this indicator?

- Yes  
 No

### 242. Feasibility

1 (definitely not feasible)      2      3      4      5      6      7      8      9 (definitely feasible)

## Indicators of research activity, output and outcomes

### 243. Validity

1 (definitely not valid)      2      3      4      5      6      7      8      9 (definitely valid)

                                              

### 244. Comments

## Indicator: g-index

Definition : A set of papers has a g-index if g is the highest rank such that top g papers have, together, at least  $g^2$  citations. We propose to calculate it over a period of 3 years

### 245. Do you understand this indicator?

- Yes  
 No

### 246. Feasibility

1 (definitely not feasible)      2      3      4      5      6      7      8      9 (definitely feasible)

                                              

### 247. Validity

1 (definitely not valid)      2      3      4      5      6      7      8      9 (definitely valid)

                                              

### 248. Comments

## Indicator: hg-index

Definition : The hg index of a researcher is computed as the geometric mean of his h and g indices. We propose to calculate it over a period of 3 years

### 249. Do you understand this indicator?

- Yes  
 No

### 250. Feasibility

1 (definitely not feasible)      2      3      4      5      6      7      8      9 (definitely feasible)

# Indicators of research activity, output and outcomes

## 251. Validity

|                          |                       |                       |                       |                       |                       |                       |                       |                       |
|--------------------------|-----------------------|-----------------------|-----------------------|-----------------------|-----------------------|-----------------------|-----------------------|-----------------------|
| 1 (definitely not valid) | 2                     | 3                     | 4                     | 5                     | 6                     | 7                     | 8                     | 9 (definitely valid)  |
| <input type="radio"/>    | <input type="radio"/> | <input type="radio"/> | <input type="radio"/> | <input type="radio"/> | <input type="radio"/> | <input type="radio"/> | <input type="radio"/> | <input type="radio"/> |

## 252. Comments

## Indicator selection

### \* 253. Please select and rank the most important indicators in that category (5 max)

|                                               | 1 (Most important indicator) | 2                     | 3                     | 4                     | 5 (Least important indicator) |
|-----------------------------------------------|------------------------------|-----------------------|-----------------------|-----------------------|-------------------------------|
| Number of publications                        | <input type="radio"/>        | <input type="radio"/> | <input type="radio"/> | <input type="radio"/> | <input type="radio"/>         |
| Number of citations                           | <input type="radio"/>        | <input type="radio"/> | <input type="radio"/> | <input type="radio"/> | <input type="radio"/>         |
| Mean citations per article                    | <input type="radio"/>        | <input type="radio"/> | <input type="radio"/> | <input type="radio"/> | <input type="radio"/>         |
| H-index for institutions                      | <input type="radio"/>        | <input type="radio"/> | <input type="radio"/> | <input type="radio"/> | <input type="radio"/>         |
| Journal impact factor                         | <input type="radio"/>        | <input type="radio"/> | <input type="radio"/> | <input type="radio"/> | <input type="radio"/>         |
| z-factor                                      | <input type="radio"/>        | <input type="radio"/> | <input type="radio"/> | <input type="radio"/> | <input type="radio"/>         |
| Number of publications in top-ranked journals | <input type="radio"/>        | <input type="radio"/> | <input type="radio"/> | <input type="radio"/> | <input type="radio"/>         |
| Number of highly cited publications           | <input type="radio"/>        | <input type="radio"/> | <input type="radio"/> | <input type="radio"/> | <input type="radio"/>         |
| Crown indicator                               | <input type="radio"/>        | <input type="radio"/> | <input type="radio"/> | <input type="radio"/> | <input type="radio"/>         |
| SP-index                                      | <input type="radio"/>        | <input type="radio"/> | <input type="radio"/> | <input type="radio"/> | <input type="radio"/>         |
| b-index                                       | <input type="radio"/>        | <input type="radio"/> | <input type="radio"/> | <input type="radio"/> | <input type="radio"/>         |
| Mean citation per papers                      | <input type="radio"/>        | <input type="radio"/> | <input type="radio"/> | <input type="radio"/> | <input type="radio"/>         |
| j-index                                       | <input type="radio"/>        | <input type="radio"/> | <input type="radio"/> | <input type="radio"/> | <input type="radio"/>         |
| e-index                                       | <input type="radio"/>        | <input type="radio"/> | <input type="radio"/> | <input type="radio"/> | <input type="radio"/>         |
| w-index                                       | <input type="radio"/>        | <input type="radio"/> | <input type="radio"/> | <input type="radio"/> | <input type="radio"/>         |
| Central index                                 | <input type="radio"/>        | <input type="radio"/> | <input type="radio"/> | <input type="radio"/> | <input type="radio"/>         |
| x-index                                       | <input type="radio"/>        | <input type="radio"/> | <input type="radio"/> | <input type="radio"/> | <input type="radio"/>         |
| m-index                                       | <input type="radio"/>        | <input type="radio"/> | <input type="radio"/> | <input type="radio"/> | <input type="radio"/>         |
| Q <sup>2</sup> index                          | <input type="radio"/>        | <input type="radio"/> | <input type="radio"/> | <input type="radio"/> | <input type="radio"/>         |
| m-quotient                                    | <input type="radio"/>        | <input type="radio"/> | <input type="radio"/> | <input type="radio"/> | <input type="radio"/>         |
| Age-Weighted Citation Ratio                   | <input type="radio"/>        | <input type="radio"/> | <input type="radio"/> | <input type="radio"/> | <input type="radio"/>         |
| Mean normalised citation score                | <input type="radio"/>        | <input type="radio"/> | <input type="radio"/> | <input type="radio"/> | <input type="radio"/>         |
| Citer h-index                                 | <input type="radio"/>        | <input type="radio"/> | <input type="radio"/> | <input type="radio"/> | <input type="radio"/>         |
| r-index                                       | <input type="radio"/>        | <input type="radio"/> | <input type="radio"/> | <input type="radio"/> | <input type="radio"/>         |
| g-index                                       | <input type="radio"/>        | <input type="radio"/> | <input type="radio"/> | <input type="radio"/> | <input type="radio"/>         |
|                                               | <input type="radio"/>        | <input type="radio"/> | <input type="radio"/> | <input type="radio"/> | <input type="radio"/>         |

## Indicators of research activity, output and outcomes

g-index

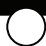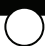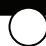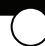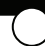

hg-index

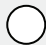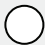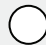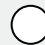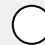

## Suggestions and comments

### 254. Suggestions for other indicators measuring research impact (maximum 5)

1

2

3

4

5

### 255. General comments
